# Supplementary material for: Statistical Evidence of Psychometric Differences Between Bing Eating Disorder and Food Addiction Screening Tools Among Spanish Speaking Patients with Non-Communicable Metabolic Diseases
Source: Research Square preprint supplement (doi:10.21203/rs.3.rs-6877570/v1), 2025-08-14
Supplement: Supplementary file 1 [file 446cbc4874f73fe418923b18.docx]

**
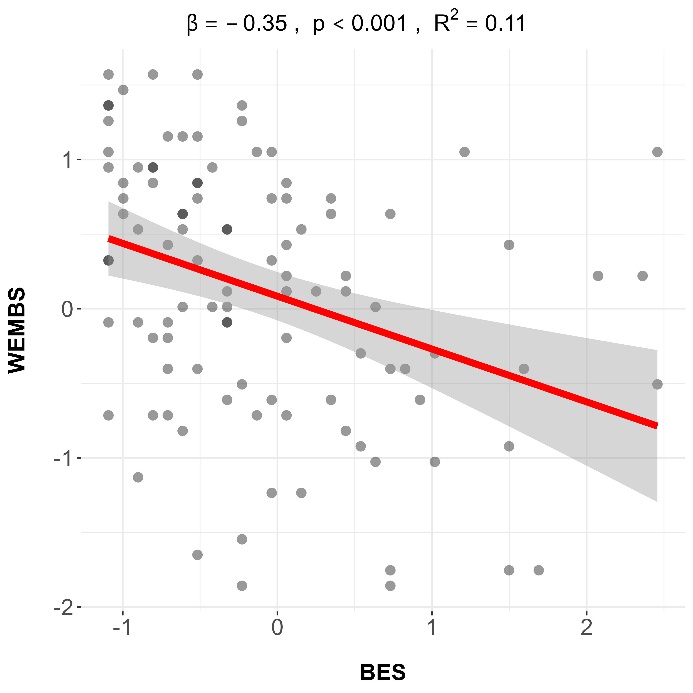

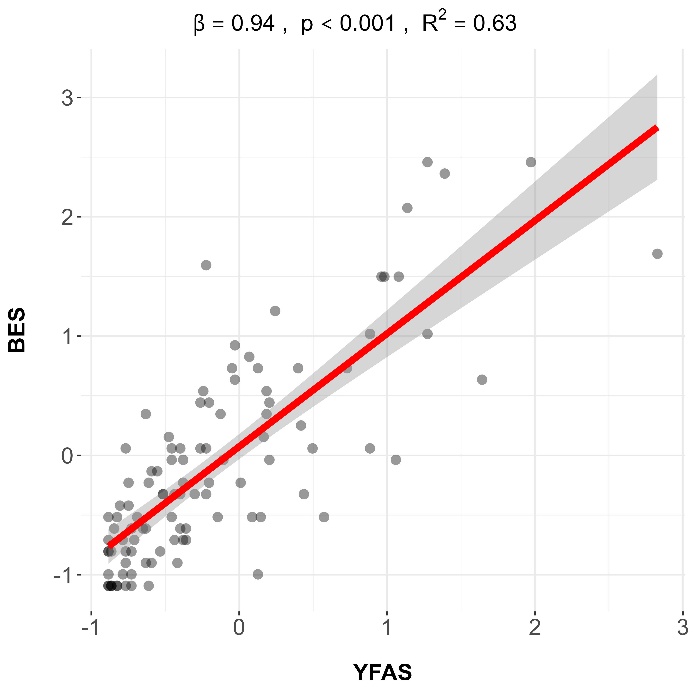

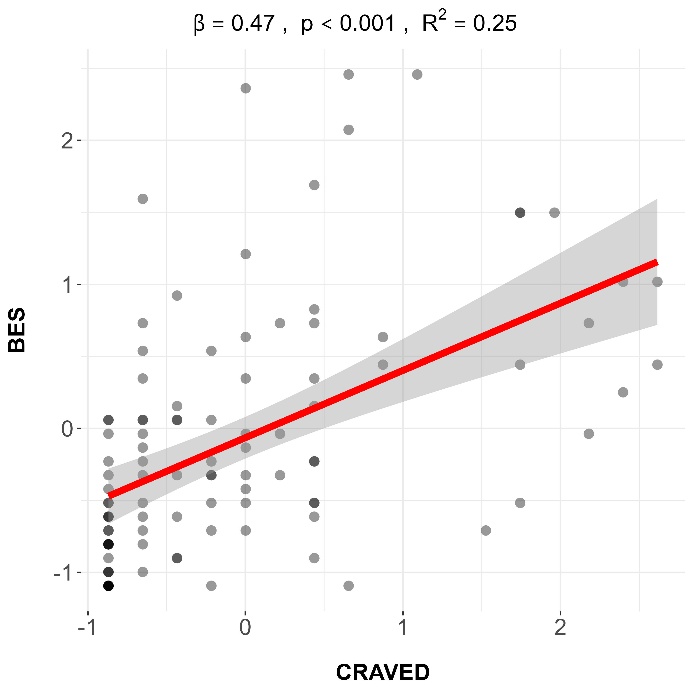

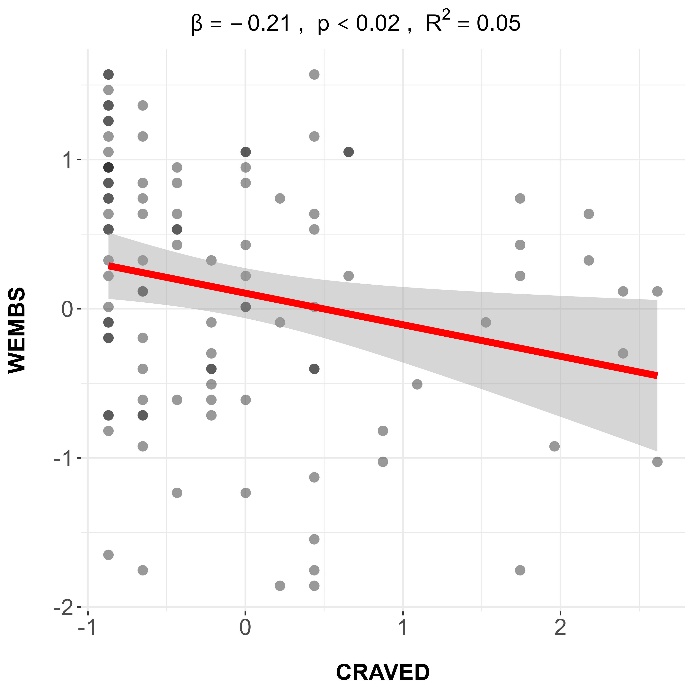

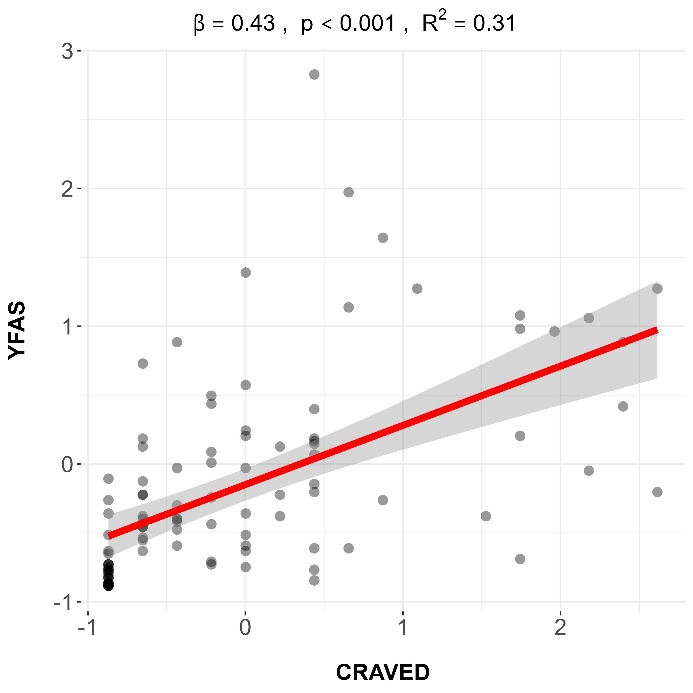

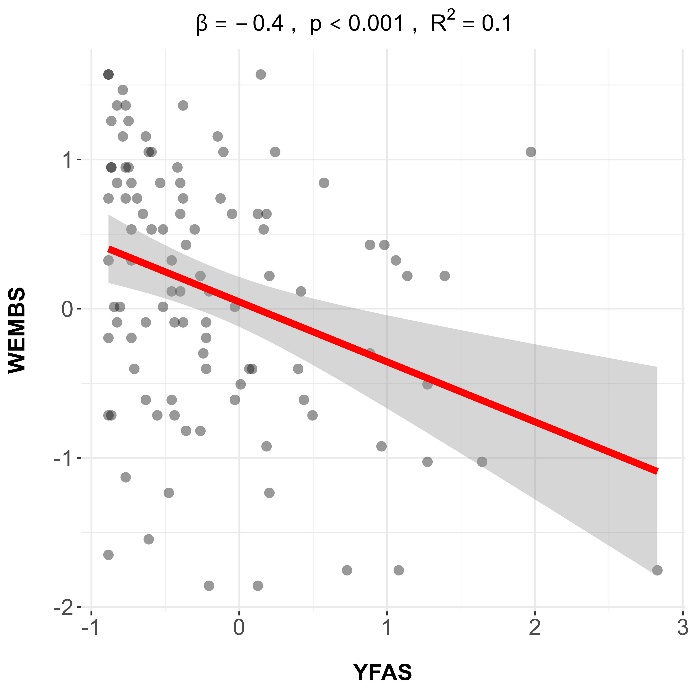
Supplemental Figure 1.** Association Between All Evaluated Scores**.**

**
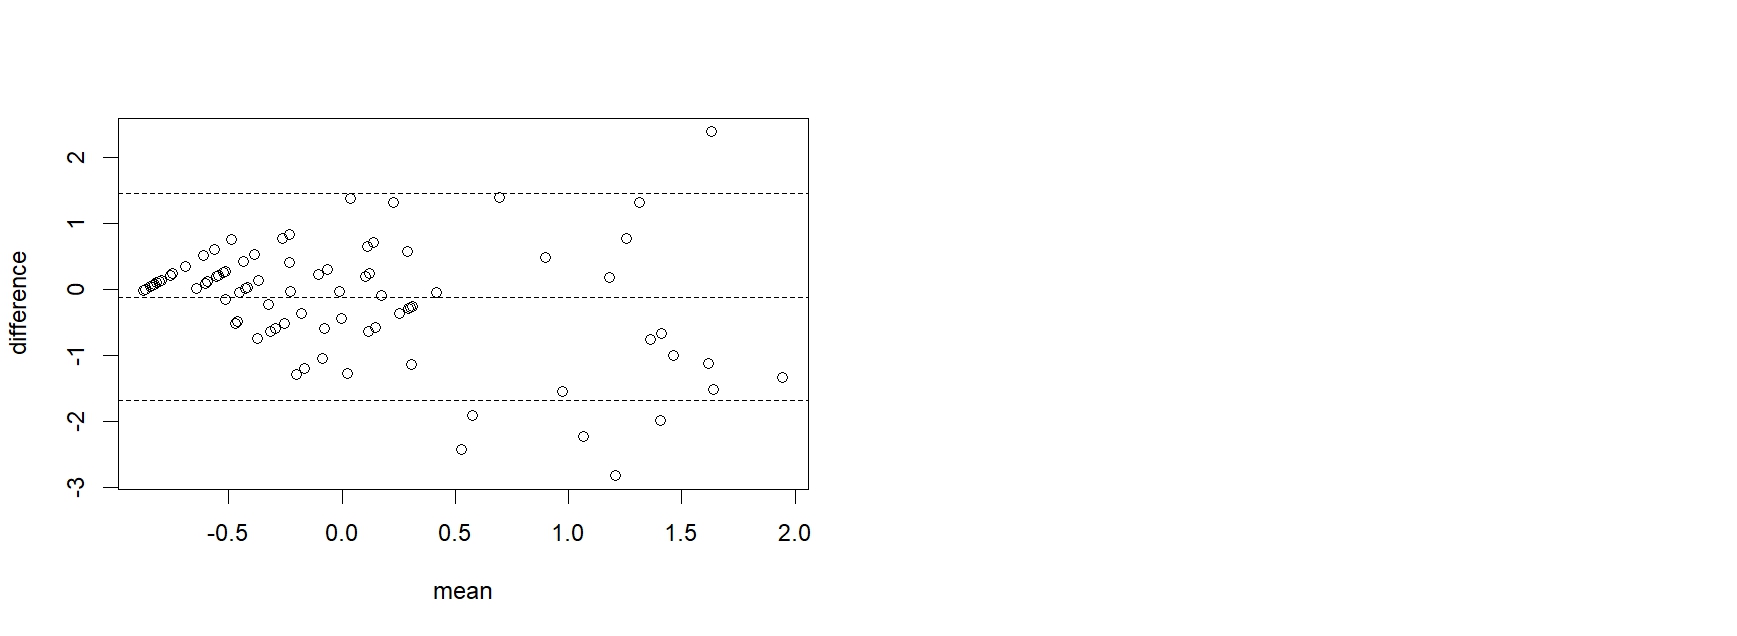
**

**Supplemental Figure 2.** Bland-Altman test between Food Addiction Screening Tools (YFAS and CRAVED)**.**

**
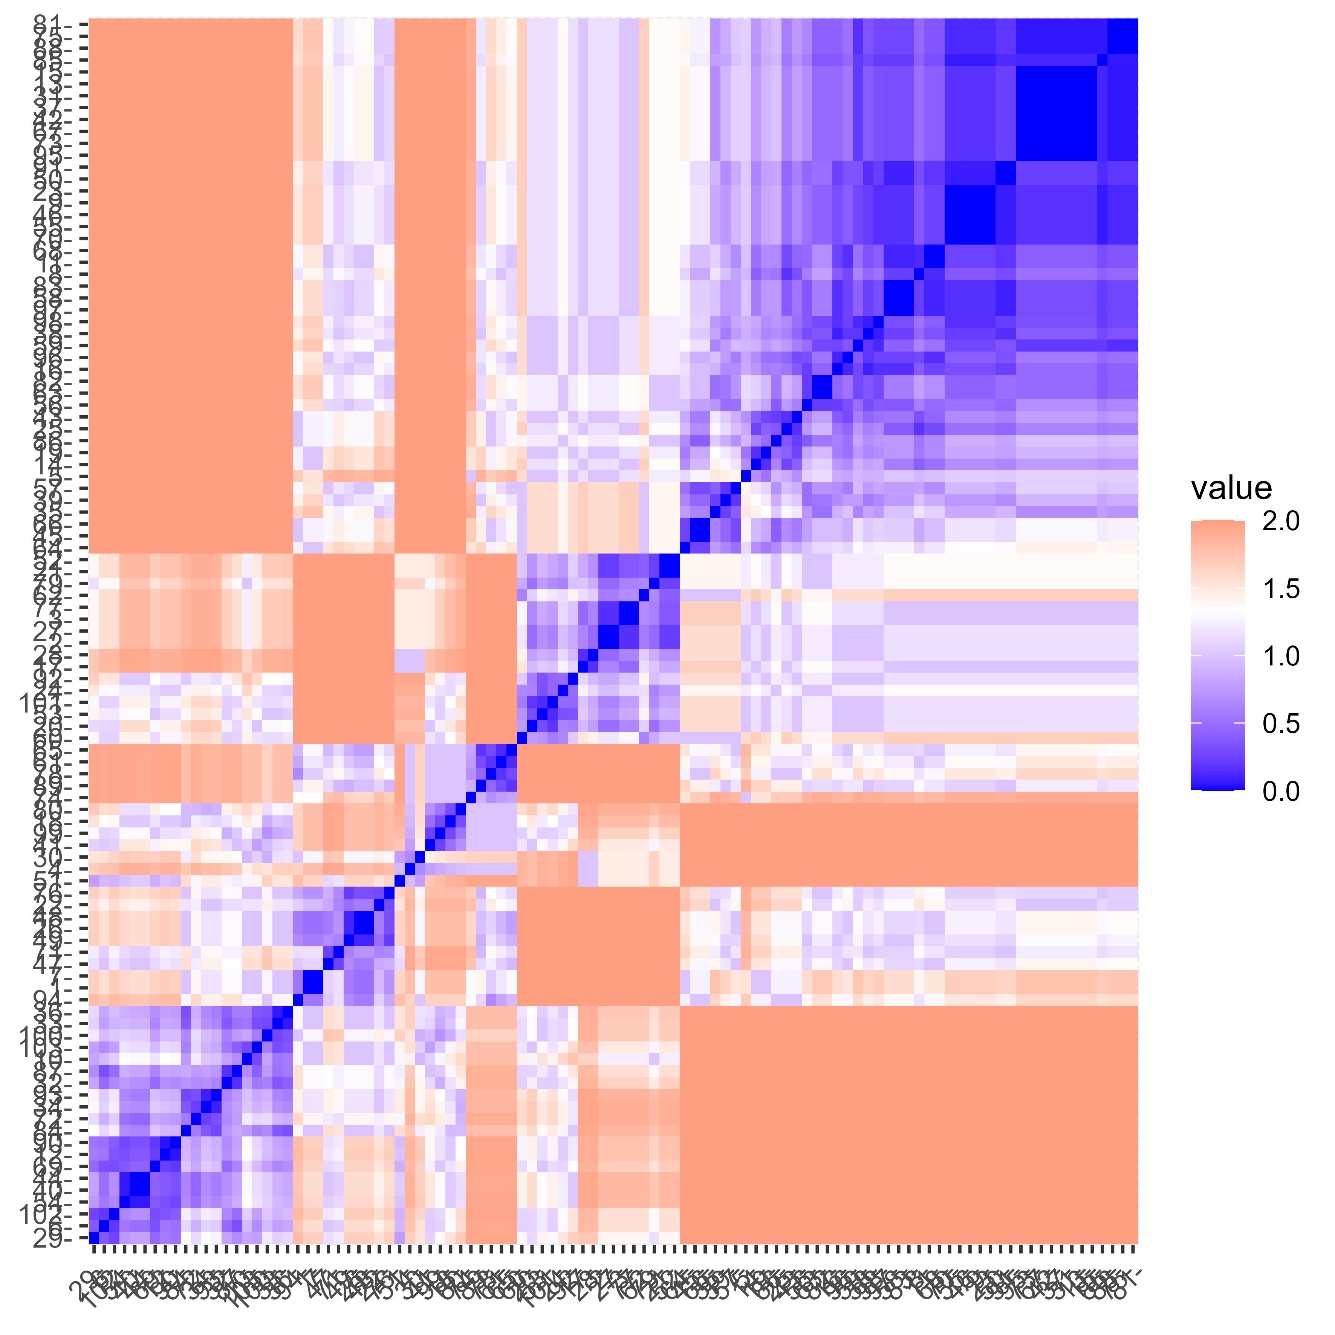
**

**Supplemental Figure 3. Correlation Matrix of BES and CRAVED scores.**


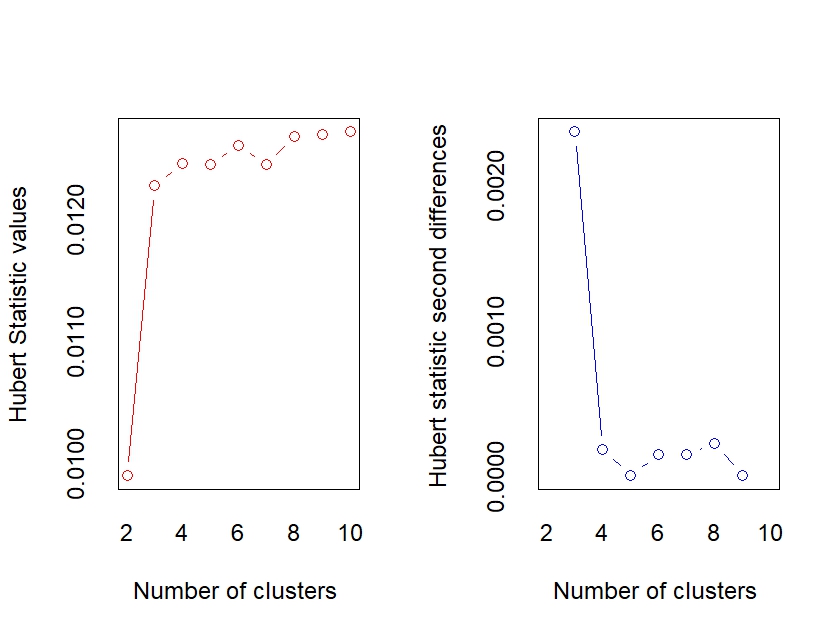


**Supplemental Figure 4.** Huber Statistic Value Plots.


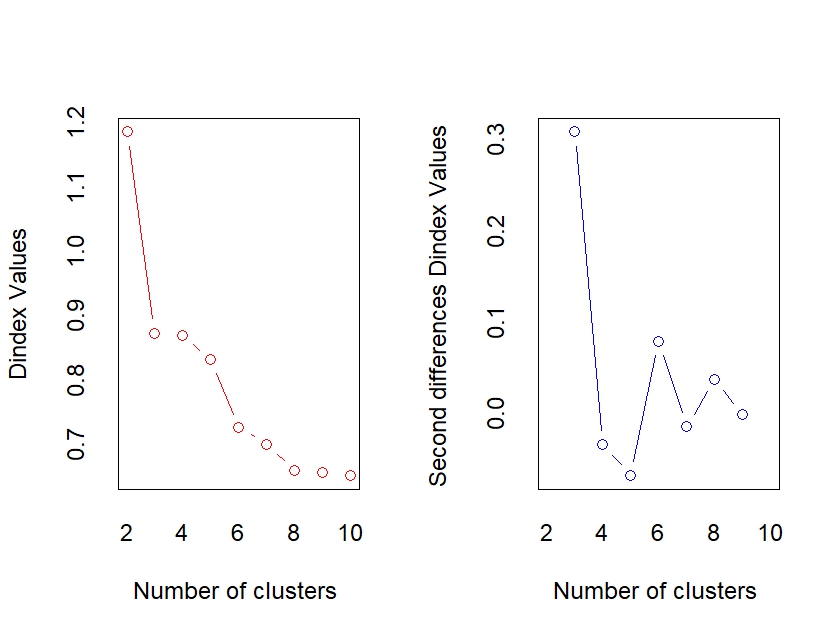


**Supplemental Figure 5.** D-index Value Plots.


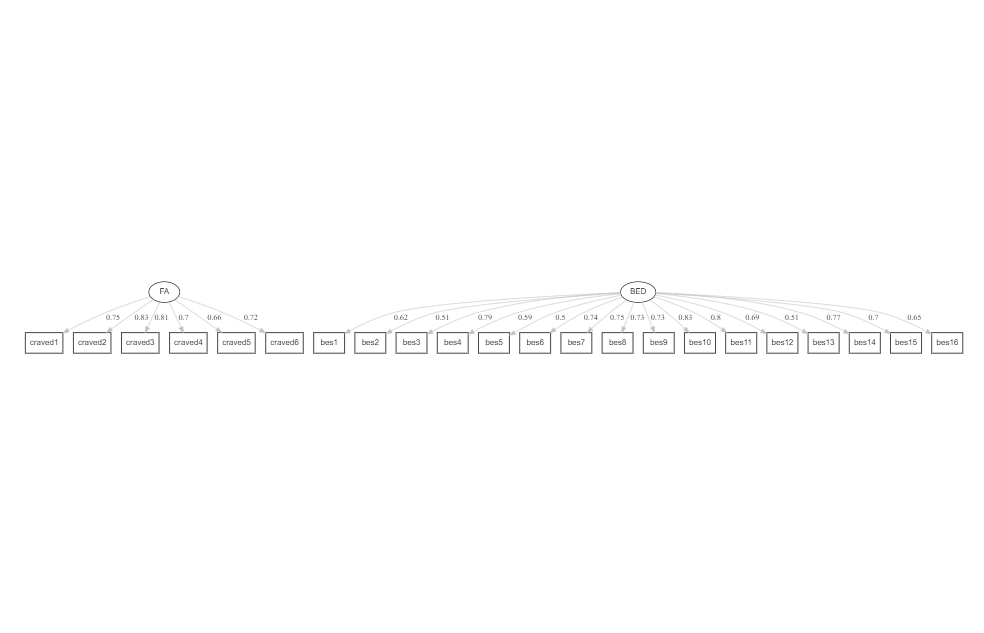


**Supplemental Figure 6.** Factor weights in Confirmatory Factor Analyses.
